# Supplementary material for: AI-Driven TanDEM-X Penetration Bias Estimation in Antarctica Using ICESat-2 and ECMWF Data: Implications for the NASA Surface Topography and Vegetation Decadal Survey Incubation study
Source: Copernicus journal article supplement (doi:10.5194/egusphere-2025-1979), 2025-06-18
Supplement: Supplementary file [file egusphere-2025-1979-AC1-supplement.pdf]

**Comment submitted by Reviewer-2 on 21/08/2025**

**Comments:** Thank you to the authors for this contribution. The work is novel and will be impactful for developing multisensor fusion architectures under the Surface Topography and Vegetation mission. After looking closely at the previous review for this submission, I do not have any further comments; I agree with the previous reviewer in that I expect a more professional written presentation before initial manuscript submission. Please revise this manuscript following the suggestions given by the previous reviewer. This will allow me to provide a more focused scientific review for the next round of revisions.

Remarks: We sincerely thank the reviewer for their positive feedback and for identifying the novelty and potential impact of our work for multisensory fusion architectures under the Surface Topography and Vegetation mission. We agree with the reviewer's suggestion regarding the written presentation of the manuscript. Following the comments provided by the first reviewer, we have made the requisite corrections in the manuscript to present more professional writing.
